# Supplementary material for: DUOX2/DUOXA2 Mutations Frequently Cause Congenital Hypothyroidism that Evades Detection on Newborn Screening in the United Kingdom
Source: PubMed Central journal article supplement (PMC6588112; doi:10.1089/thy.2018.0587), 2019-06-03
Supplement: Supp_Table1.pdf [file Supp_Table1.pdf]

SUPPLEMENTARY TABLE S1. CLINICAL, DEMOGRAPHIC, AND BIOCHEMICAL CHARACTERISTICS OF THE CASES HARBORING DUOX2 AND DUOX2A2 MUTATIONS

| Case (sex)                               | UK ONS    | Consanguinity | Guthrie TSH 1<br>(ref. range<br><6 mIU/L) | Guthrie TSH 2<br>(ref. range<br><6 mIU/L) | Venous TSH<br>(ref. range<br><6 mIU/L) | Venous fT4<br>(ref. range<br>12.5–24.6 pmol/L) | Technetium scan   | Outcome of CH/dose<br>of levothyroxine |
|------------------------------------------|-----------|---------------|-------------------------------------------|-------------------------------------------|----------------------------------------|------------------------------------------------|-------------------|----------------------------------------|
| <i>Cases harboring DUOX2 mutations</i>   |           |               |                                           |                                           |                                        |                                                |                   |                                        |
| 1 (M)                                    | R Chinese | N             | 6.6 (5)                                   | 14.8 (14)                                 | 58.4 (20)                              | 7.3                                            | NA                | Transient                              |
| 2 (M)                                    | R Chinese | N             | 11.8 (5)                                  | 16 (9)                                    | 54.0 (15)                              | 9.4                                            | Avid uptake       | Transient                              |
| 3 (F)                                    | K Asian   | Y             | 18.2 (6)                                  | 17.6 (13)                                 | 47.6 (18)                              | 15.8                                           | Normal location   | Reducing dose of LT4                   |
| 4 (F)                                    | K Asian   | N             | 7.5 (5)                                   | 8.9 (13)                                  | 30.1                                   | 15.7                                           | Avid uptake       | 2.13 µg/kg at 4 years                  |
| 5 (F)                                    | A White   | N             | 13.6 (5)                                  | 10.8 (12)                                 | 36.4 (19)                              | 10.9                                           | Avid uptake       | Transient                              |
| 6 (F)                                    | N Black   | N             | 17.4 (6)                                  | 70.7 (22)                                 | 76.9 (28)                              | 4.8                                            | Avid uptake       | Transient                              |
| 7 (M)                                    | A White   | N             | 9.9 (5)                                   | 12 (10)                                   | 34.0 (16)                              | 12.0                                           | Reasonable uptake | Transient                              |
| 8 (F)                                    | L Asian   | N             | 18.8 (5)                                  | 40 (11)                                   | 150 (18)                               | 8.1                                            | Avid uptake       | 1.85 µg/kg at 3.5 years                |
| 9 (F)                                    | J Asian   | Y             | 8.0 (5)                                   | 34.5 (15)                                 | 69.0 (18)                              | 6.2                                            | Avid uptake       | Transient                              |
| 10 (M)                                   | S Asian   | N             | 7 (11)                                    | 10.5 (16)                                 | 36.5 (21)                              | 12.5                                           | Avid uptake       | Reducing dose of LT4                   |
| 11 (F)                                   | K Asian   | N             | 12.7 (6)                                  | 37.1 (13)                                 | 146 (20)                               | <3.9                                           | Avid uptake       | Transient                              |
| 12 (F)                                   | L Asian   | N             | 9.3 (8)                                   | 16.2 (19)                                 | 29.8 (24)                              | 12.8                                           | NA                | 2.25 µg/kg at 2.3 years                |
| 13 (M)                                   | H Asian   | N             | 6.2 (5)                                   | 12.6 (13)                                 | 45.2 (19)                              | 14.8                                           | Normal uptake     | 1.6 µg/kg at 2.75 years                |
| 14 (M)                                   | R Other   | N             | 8.8 (6)                                   | 13.3 (12)                                 | 80.1 (20)                              | 3.9                                            | Avid uptake       | 1.1 µg/kg at 2.5 years                 |
| 15 (M)                                   | R Chinese | N             | 9.6 (6)                                   | 28.5 (15)                                 | 35.8                                   | 8.8                                            | Avid uptake       | Transient                              |
| 16 (M)                                   | K Asian   | Y             | 12.3 (5)                                  | 25.2 (13)                                 | 92.8                                   | 4.65                                           | Normal uptake     | 0.8 µg/kg at 1.75 years                |
| 17 (M)                                   | R Chinese | N             | 8.2 (5)                                   | 17.5 (12)                                 | 85.7                                   | 6                                              | Avid uptake       | 2.7 µg/kg at 1.3 years                 |
| 18 (F)                                   | H Asian   | N             | 11.7 (5)                                  | 46.6 (10)                                 | 95.81                                  | 11.3                                           | NA                | 1.71 µg/kg at 1.8 years                |
| 19 (F)                                   | J Asian   | N             | 8.4 (5)                                   | 7.9 (13)                                  | 51.5                                   | 12.5                                           | Avid uptake       | 2.95 µg/kg at 1.3 years                |
| 20 (M)                                   | F Mixed   | N             | 12.9 (5)                                  | —                                         | 65.9                                   | 9.6                                            | NA                | 4.20 µg/kg at 1.5 years                |
| <i>Cases harboring DUOX2A2 mutations</i> |           |               |                                           |                                           |                                        |                                                |                   |                                        |
| 21 (M)                                   | J Asian   | N             | 10.9 (4)                                  | 24.1 (11)                                 | 62.1 (16)                              | 9.4                                            | Avid uptake       | Reducing dose of LT4                   |
| 22 (M)                                   | K Asian   | N             | 13.1 (6)                                  | 25 (15)                                   | 101.0 (23)                             | 6.5                                            | Avid uptake       | Transient                              |
| 23 (F)                                   | S Mixed   | N             | 12.3 (5)                                  | 25.6 (13)                                 | 101.0 (18)                             | 8.7                                            | Avid uptake       | 2.7 µg/kg at 4.2 years                 |
| 24 (M)                                   | K Asian   | N             | 14.1 (6)                                  | 12.5 (13)                                 | 29.3 (16)                              | 11.8                                           | Avid uptake       | Transient                              |
| 25 (F)                                   | A white   | N             | 7.9 (5)                                   | 14.3 (12)                                 | 48.2 (18)                              | 9.2                                            | Avid uptake       | Reducing dose of LT4                   |
| 26 (M)                                   | H Asian   | N             | 14.6 (4)                                  | 34.6 (12)                                 | 125.0 (18)                             | 5.5                                            | Avid uptake       | NA                                     |

Ethnicity is recorded according to the UK Office for National Statistics (ONS) coding at newborn screening. Where available, age in days at sampling is denoted in parentheses after hormone measurements. “Avid uptake” is uptake above the normal range, which is defined as 0.45–1.7%.
