# Supplementary material for: DUOX2/DUOXA2 Mutations Frequently Cause Congenital Hypothyroidism that Evades Detection on Newborn Screening in the United Kingdom
Source: PubMed Central journal article supplement (PMC6588112; doi:10.1089/thy.2018.0587), 2019-06-03
Supplement: Supp_Table2.pdf [file Supp_Table2.pdf]

SUPPLEMENTARY TABLE S2. CLINICAL, DEMOGRAPHIC, AND BIOCHEMICAL CHARACTERISTICS OF MUTATION NEGATIVE CASES

| Case   | UK ONS    | Consanguinity | Guthrie TSH 1<br>(ref. range<br><6 mIU/L) | Guthrie TSH 2<br>(ref. range<br><6 mIU/L) | Venous TSH<br>(ref. range<br><6 ImU/L) | Venous fT4<br>(ref. range<br>12.5–24.6 pmol/L) | Technetium scan    | Dose LT4                 |
|--------|-----------|---------------|-------------------------------------------|-------------------------------------------|----------------------------------------|------------------------------------------------|--------------------|--------------------------|
| 27 (M) | N Black   | N             | 15.6 (13)                                 | 11 (18)                                   | 35.1 (21)                              | 12.4                                           | Avid uptake        | Transient                |
| 28 (F) | H Asian   | N             | 6.8 (4)                                   | 23.9 (10)                                 | 76.8 (18)                              | <3.9                                           | Avid uptake        | Transient                |
| 29 (M) | A White   | N             | 13.8 (6)                                  | 27.3(13)                                  | 100.0 (20)                             | 4.3                                            | Avid uptake        | Transient                |
| 30 (F) | H Asian   | N             | 17.8 (5)                                  | 10.6 (11)                                 | 38.6 (18)                              | 13.6                                           | Low uptake         | 4.73 µg/kg at 3.8 years  |
| 31 (M) | A White   | N             | 6.8 (5)                                   | 11.2 (8)                                  | 33.9 (16)                              | 10.2                                           | Avid uptake        | 1.58 µg/kg at 3.8 years  |
| 32 (F) | G Mixed   | N             | 10.0 (5)                                  | 9.6 (18)                                  | 35.3 (26)                              | 7.4                                            | Avid uptake        | Transient                |
| 33 (F) | H Asian   | N             | 9.7 (5)                                   | 9.3 (2)                                   | 29.6 (12)                              | 14.9                                           | Poor uptake        | 1.3 µg/kg at 3.25 years  |
| 34 (M) | K Asian   | N             | 14.6 (5)                                  | 34.9 (12)                                 | 75.3 (19)                              | 10.5                                           | Normal uptake      | Transient                |
| 35 (M) | White     | N             | 12.1 (5)                                  | 10.3 (20)                                 | 38.4 (26)                              | 12.0                                           | NA                 | 2.1 µg/kg at 4 years     |
| 36 (F) | White     | N             | 8.8 (5)                                   | 24.1 (12)                                 | 40.9 (19)                              | 8.5                                            | Avid uptake        | Transient                |
| 37 (M) | J Asian   | Y             | 12.3 (6)                                  | 21.9 (16)                                 | 55.6 (20)                              | 8.5                                            | Avid uptake        | 2.2 µg/kg at 3.25 years  |
| 38 (M) | L Asian   | Y             | 11.5 (5)                                  | 21.6 (14)                                 | 34.6 (19)                              | 10.3                                           | Avid uptake        | Transient                |
| 39 (F) | S Asian   | N             | 18.3 (6)                                  | 16.2 (14)                                 | 27.5 (19)                              | 13.9                                           | Clearly visualized | Transient                |
| 40 (M) | J Asian   | Y             | 15.1 (7)                                  | 17(14)                                    | 68.0 (20)                              | 9.6                                            | Avid uptake        | 1.45 µg/kg at 3 years    |
| 41 (F) | N Black   | N             | 12.2 (5)                                  | 7.5 (15)                                  | 25                                     | 15.6                                           | Poor uptake        | 1.5 µg/kg at 3.3 years   |
| 42 (M) | S Other   | Y             | 10 (5)                                    | 10.6 (12)                                 | 32.3 (16)                              | 12.2                                           | Avid uptake        | Transient                |
| 43 (M) | G Mixed   | N             | 14.6 (5)                                  | 7.5 (12)                                  | 26.8 (18)                              | 14.0                                           | Avid uptake        | 1.86 µg/kg at 2.75 years |
| 44 (F) | A white   | N             | 10.4 (5)                                  | 8.3 (12)                                  | 41.1 (19)                              | 12.0                                           | Low uptake         | 2 µg/kg at 2.5 years     |
| 45 (M) | B White   | N             | 8.5 (6)                                   | 11.3 (12)                                 | 35.2 (17)                              | 8.1                                            | Avid uptake        | 1.85 µg/kg at 2.5 years  |
| 46 (M) | NS Asian  | N             | 12.6 (5)                                  | 17.4 (8)                                  | 47.4 (12)                              | 12.4                                           | Normal uptake      | 2.1 µg/kg at 2.4 years   |
| 47 (M) | L Asian   | N             | 11.8 (7)                                  | 20.3 (12)                                 | 26.4                                   | 11.3                                           | Avid uptake        | 1.55 µg/kg at 2.3 years  |
| 48 (M) | R Chinese | N             | 14.6 (5)                                  | 35 (13)                                   | 25.4                                   | 11.8                                           | Low grade uptake   | Transient                |
| 49 (M) | K Asian   | N             | 15.7 (5)                                  | 30 (10)                                   | 60.6 (17)                              | 11.5                                           | Avid uptake        | 2.7 µg/kg at 2.1 years   |
| 50 (F) | Asian     | Y             | 9.8 (6)                                   | 10 (13)                                   | 26.2                                   | 15.3                                           | Reduced uptake     | 3.6 µg/kg at 1.75 years  |
| 51 (F) | K Asian   | N             | 6.4 (5)                                   | 10.3                                      | 25                                     | 13                                             | Avid uptake        | 2.14 µg/kg at 1.8 years  |
| 52 (F) | N Black   | N             | 6.3 (5)                                   | 13.6 (12)                                 | 43.1                                   | 10.9                                           | Avid uptake        | 1.8 µg/kg at 1.6 years   |

Ethnicity is recorded according to the UK ONS coding at newborn screening. Where available, age in days at sampling is denoted in parentheses after hormone measurements. “Avid uptake” is uptake above the normal range, which is defined as 0.45–1.7%.
