# Supplementary material for: DUOX2/DUOXA2 Mutations Frequently Cause Congenital Hypothyroidism that Evades Detection on Newborn Screening in the United Kingdom
Source: PubMed Central journal article supplement (PMC6588112; doi:10.1089/thy.2018.0587), 2019-06-03
Supplement: Supp_Table3.pdf [file Supp_Table3.pdf]

SUPPLEMENTARY TABLE S3. SUMMARY OF DUOX2 AND DUOX42 MUTATIONS IDENTIFIED IN THIS STUDY

| Case                    | cDNA                   | Protein                   | Inheritance | Zygosity     | Known/Novel  | AF (ExAC) | Max. AF ExAC (Ethnicity)              | SIFT             | PolyPhen            |
|-------------------------|------------------------|---------------------------|-------------|--------------|--------------|-----------|---------------------------------------|------------------|---------------------|
| <b>DUOX2 mutations</b>  |                        |                           |             |              |              |           |                                       |                  |                     |
| 1 (M) <sup>a</sup>      | c.1232G>A              | p.R411K                   | M           | Heterozygous | Known        | 0.00005   | 0.0007 (East Asian)                   | Del              | Poss D              |
| 2 (M)                   | c.3251G>A              | p.R1084Q                  | P           | Heterozygous | Known        | 0.00007   | 0.0002 (East Asian)                   | Del              | Prob D              |
| 3 (F)                   | c.3693 + 1G>T          | NA                        | M           | Heterozygous | Known        | 0.0001    | 0.002 (East Asian)                    | NA               | NA                  |
| 4 (F)                   | c.2895_2898delGTTC     | p.F966Sfs*29              | M           | Heterozygous | Known        | 0.003     | 0.01 (European Finnish)               | NA               | NA                  |
| 5 (F)                   | c.2895_2898delGTTC     | p.Q570L                   | NA          | Heterozygous | Known        | 0.003     | 0.01 (South Asian)                    | Del              | Prob D              |
| 6 (F)                   | <b>c.385C&gt;T</b>     | <b>p.L129F</b>            | M           | Heterozygous | <b>Novel</b> | 0.00005   | <b>0.00009 (European non-Finnish)</b> | T                | B                   |
| 7 (M)                   | c.2290C>T              | p.R764W                   | M           | Heterozygous | Known        | 0.0004    | 0.004 (African)                       | Del              | Prob D              |
| 8 (F)                   | c.2895_2898delGTTC     | p.F966Sfs*29              | M           | Heterozygous | Known        | 0.003     | 0.01 (European Finnish)               | NA               | NA                  |
| 9 (F)                   | c.1709A>T              | p.Q570L                   | M, P        | Homozygous   | Known        | 0.003     | 0.01 (South Asian)                    | Del              | Prob D              |
| 10 (M)                  | c.602dupG              | p.Q202Tfs*99              | M, P        | Homozygous   | Known        | 0.001     | 0.0031 (Latino)                       | NA               | NA                  |
| 11 (F)                  | c.2635G>A              | p.E879K                   | M           | Heterozygous | Known        | 0.00005   | 0.0006 (East Asian)                   | Del              | Prob D              |
| 12 (F) <sup>a</sup>     | c.1709A>T              | p.Q570L                   | M           | Heterozygous | Known        | 0.003     | 0.01 (South Asian)                    | Del              | Prob D              |
| 13 (M) <sup>a</sup>     | c.1709A>T              | <b>p.A239T</b>            | M           | Heterozygous | <b>Novel</b> | —         | —                                     | T                | B                   |
| 14 (M)                  | c.1709A>T              | p.Q570L                   | P           | Heterozygous | Known        | 0.003     | 0.01 (South Asian)                    | Del              | Prob D              |
| 15 (M)                  | c.4405G>A              | p.E1469K                  | M           | Heterozygous | Known        | 0.00006   | 0.0003 (South Asian)                  | Del              | Prob D              |
| 16 (M)                  | c.1462G>A              | p.G488R                   | M           | Heterozygous | Known        | 0.0002    | 0.002 (South Asian)                   | Del              | Prob D              |
| 17 (M)                  | c.2048G>T              | p.R683L                   | P           | Heterozygous | Known        | 0.0003    | 0.004 (East Asian)                    | Del              | Prob D              |
| 18 (F)                  | c.4027C>T              | p.L1343F                  | P           | Heterozygous | Known        | 0.0005    | 0.007 (East Asian)                    | Del              | Poss D              |
| 19 (F) <sup>a</sup>     | c.2895_2898delGTTC     | p.F966Sfs*29              | NA          | Homozygous   | Known        | 0.003     | 0.01 (European Finnish)               | NA               | NA                  |
| 20 (M)                  | c.605_621del17         | p.Q202Rfs*93              | P           | Homozygous   | Known        | —         | —                                     | NA               | NA                  |
| 21 (M)                  | c.602dupG              | p.Q202Tfs*99              | M, P        | Homozygous   | Known        | 0.001     | 0.0031 (Latino)                       | NA               | NA                  |
| 22 (M)                  | c.1709A>T              | p.Q570L                   | M           | Heterozygous | Known        | 0.003     | 0.01 (South Asian)                    | Del              | Prob D              |
| 23 (F) <sup>a</sup>     | <b>c.3940G&gt;A</b>    | <b>p.E1314K</b>           | P           | Heterozygous | <b>Novel</b> | 0.00002   | 0.00006 (South Asian)                 | Del              | Prob D              |
| 24 (M)                  | c.2894C>T              | p.S965L                   | NA          | Heterozygous | Known        | 0.0001    | 0.0005 (East Asian)                   | Del              | B                   |
| <b>DUOX42 mutations</b> |                        |                           |             |              |              |           |                                       |                  |                     |
| 21 (M)                  | <b>c.382G&gt;T</b>     | <b>p.E128*</b>            | P           | Heterozygous | <b>Novel</b> | 0.00002   | 0.0001 (South Asian)                  | NA               | NA                  |
| 22 (M)                  | <b>c.363_365delCGA</b> | <b>p.N121_E122delinsK</b> | NA          | Heterozygous | <b>Novel</b> | —         | —                                     | Del <sup>a</sup> | Prob D <sup>a</sup> |
| 23 (F) <sup>a</sup>     | <b>c.790G&gt;C</b>     | <b>p.G264R</b>            | P           | Heterozygous | <b>Novel</b> | —         | —                                     | NA               | NA                  |
| 24 (M)                  | <b>c.893_894delTT</b>  | <b>p.L298Hfs*21</b>       | M           | Heterozygous | <b>Novel</b> | 0.0009    | 0.0099 (African)                      | NA               | NA                  |
| 25 (F) <sup>a</sup>     | <b>c.232G&gt;A</b>     | <b>p.V78M</b>             | NA          | Heterozygous | <b>Novel</b> | 0.00005   | 0.0004 (South Asian)                  | Del              | Prob D              |
| 26 (M)                  | <b>c.228G&gt;T</b>     | <b>p.W76C</b>             | P           | Heterozygous | <b>Novel</b> | 0.00005   | 0.00008 (Latino)                      | Del              | Prob D              |
| 27 (M)                  | <b>c.611T&gt;C</b>     | <b>p.L204P</b>            | M           | Heterozygous | <b>Novel</b> | 0.00005   | 0.00009 (European, non-Finnish)       | Del              | Poss D              |
| 28 (M)                  | <b>c.382G&gt;T</b>     | <b>p.E128*</b>            | M           | Heterozygous | <b>Novel</b> | 0.00002   | 0.0001 (South Asian)                  | NA               | NA                  |

Novel mutations shown in bold; previously described in association with CH but not functionally characterized shown in italics; previously described in association with CH and functionally characterized or truncating shown in normal type.

<sup>a</sup>Cases who were compound heterozygous for two different mutations. All mutations were predicted to be disease-causing by MutationTaster.

SIFT: Del, deleterious; T, tolerated; NA, not available (non-single amino acid change); AF Exac, total allele frequency (Exome Aggregation Consortium [ExAC], Cambridge, MA; <http://exac.broadinstitute.org>); Max.AF ExAC, maximal allele frequency (ExAC), with the corresponding ethnicity in parentheses. PolyPhen: Prob D, probably damaging; Poss D, possibly damaging; B, benign. Inheritance: P, paternal; M, maternal; NA, not available.
